# Supplementary material
Source: PubMed Central journal article supplement (PMC3476732)
Supplement: NIHMS410263-supplement-suppl_table.pdf [file NIHMS410263-supplement-suppl_table.pdf]

**Supplementary Table 1: Summary of Pharmacokinetic data<sup>a</sup>**

| <b>Parameter</b>                  | <b>Absence of Rosuvastatin</b> | <b>Presence of Rosuvastatin</b> | <b>P-value<sup>b</sup></b> |
|-----------------------------------|--------------------------------|---------------------------------|----------------------------|
| <b><i>Imatinib</i></b>            |                                |                                 |                            |
| AUC <sub>Tau</sub> (μg*h/mL)      | 37.6 ± 19.8<br>(34.3)          | 37.0 ± 21.8<br>(33.2)           | 0.80                       |
| Cmin (ng/mL)                      | 931 ± 457<br>(839)             | 935 ± 590<br>(832)              | 0.97                       |
| Cmax (ng/mL)                      | 2717 ± 1393<br>(2464)          | 2616 ± 1661<br>(2335)           | 0.65                       |
| T <sub>1/2z</sub> (h)             | 19.1 ± 2.81<br>(18.9)          | 18.9 ± 4.60<br>(18.4)           | 0.81                       |
| <b><i>CGP74588</i></b>            |                                |                                 |                            |
| AUC <sub>Tau</sub> (μg*h/mL)      | 7.18 ± 3.07<br>(6.48)          | 6.62 ± 3.12<br>(5.91)           | 0.27                       |
| Cmin (ng/mL)                      | 221 ± 104<br>(196)             | 210 ± 110<br>(183)              | 0.58                       |
| Cmax (ng/mL)                      | 476 ± 206<br>(430)             | 419 ± 199<br>(375)              | 0.077                      |
| T <sub>1/2z</sub> (h)             | 39.0 ± 12.8<br>(37.2)          | 33.1 ± 6.42<br>(32.5)           | 0.15                       |
| AUC Ratio <sub>CGP/Imatinib</sub> | 0.197 ± 0.056<br>(0.189)       | 0.187 ± 0.060<br>(0.178)        | 0.065                      |

<sup>a</sup>Pharmacokinetic data are shown as mean values ± standard deviation (geomean). <sup>b</sup>As calculated in a paired analysis (T-test).

AUC<sub>Tau</sub>, area under the plasma concentration time curve for a dosing interval; Cmin, imatinib or CGP74588 trough plasma level; Cmax, imatinib or CGP74588 peak plasma level; T<sub>1/2z</sub>, terminal elimination half-life.
