# Supplementary material
Source: PubMed Central journal article supplement (PMC3476732)

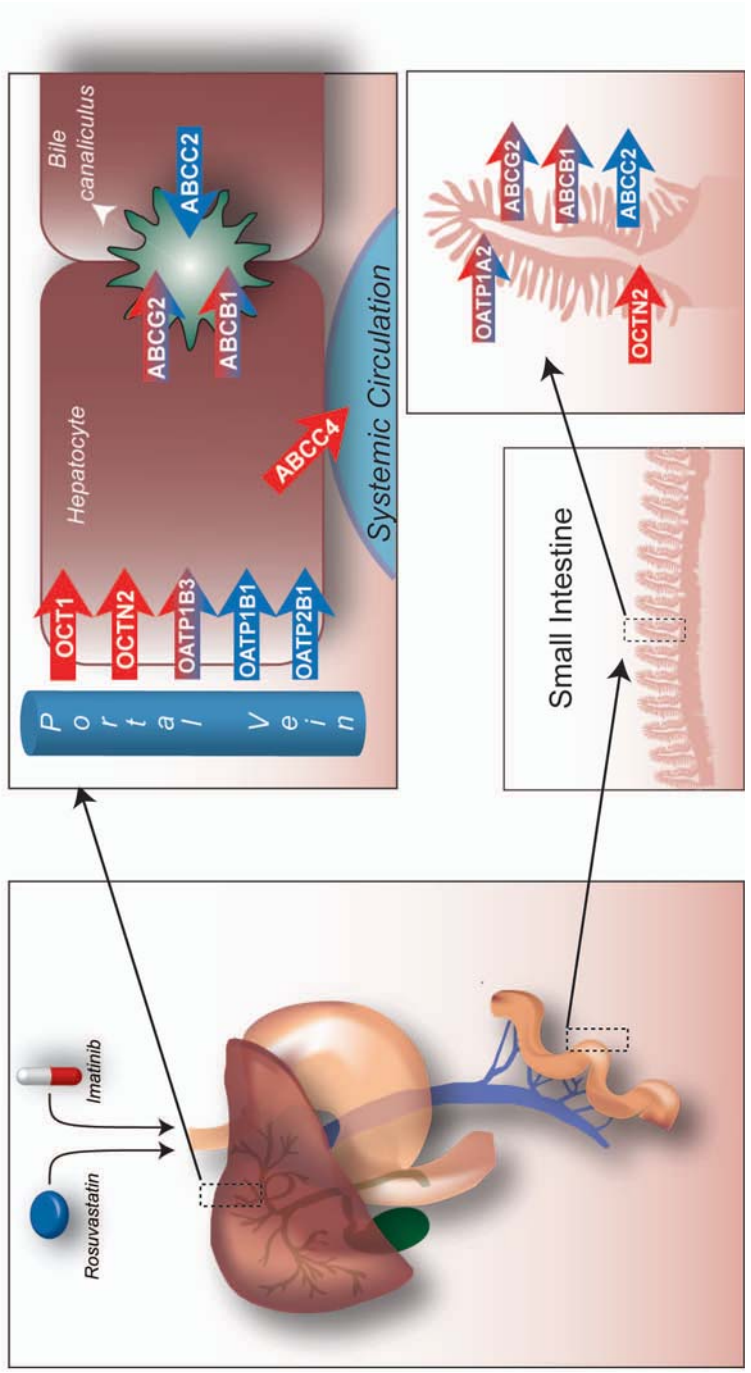

Supplement: NIHMS410263-supplement-suppl_fig.pdf [file NIHMS410263-supplement-suppl_fig.pdf]
